# Supplementary material for: A pillararene-based supramolecular polymer hydrogel for removal of organic dyes from water
Source: Royal Society of Chemistry journal article supplement (doi:10.1039/d4qm00793j), 2024-12-03
Supplement: d4qm00793j1.pdf [file d4qm00793j1.pdf]

## Supporting Information

### **A pillararene-based supramolecular polymer hydrogel for removal of organic dyes from water**

Jiixin Ma<sup>a</sup>, Shanhao Gong<sup>b</sup>, Yujie Cheng<sup>a</sup>, Wei Cao<sup>a</sup>, Xuehong Wei,<sup>a</sup> Pi Wang<sup>b,\*</sup>, and  
Danyu Xia<sup>a,\*</sup>

*<sup>a</sup>Scientific Instrument Center, Shanxi University, Taiyuan 030006, P. R. China*

*<sup>b</sup>College of Materials Science and Engineering, Taiyuan University of Technology, Taiyuan  
030024, P.R. China*

---

\* Corresponding authors.

*E-mail address:* danyuxia@sxu.edu.cn, wangpi@tyut.edu.cn

## Table of Contents

|     |                                                                                     |    |
|-----|-------------------------------------------------------------------------------------|----|
| 1.  | Materials and methods                                                               | 3  |
| 2.  | Chemical structures of <b>WP5</b> , <b>M</b> and <b>PSS</b>                         | 3  |
| 3.  | Macroscopic pictures of <b>WP5-</b> and <b>M</b> -based supramolecular polymers     | 4  |
| 4.  | <sup>1</sup> H NMR characterization of the <b>WP5</b> -based supramolecular polymer | 5  |
| 5.  | Water content analysis of hydrogel <b>SPH-1</b>                                     | 5  |
| 6.  | TG Analysis                                                                         | 6  |
| 7.  | Porosity and surface area measurements for <b>SPH-1</b>                             | 6  |
| 8.  | XRD patterns                                                                        | 7  |
| 9.  | Adsorption data of <b>SPH-1</b> and <b>SPH-2</b>                                    | 8  |
| 10. | Adsorption kinetics                                                                 | 10 |
| 11. | Adsorption isotherms                                                                | 11 |
| 12. | Effect of ionic strength on adsorption of EBT                                       | 11 |
| 13. | Effect of pH on adsorption of EBT                                                   | 12 |
| 14. | pH <sub>PZC</sub> of <b>SPH-1</b>                                                   | 12 |
| 15. | Adsorption data of <b>SPH-1</b> with EBT at pH = 3                                  | 13 |
| 16. | Adsorption studies of EBT dye in real samples                                       | 14 |
| 17. | Selective adsorption                                                                | 15 |
| 18. | Activated carbon adsorption data for EBT                                            | 16 |
|     | References                                                                          | 17 |

## 1. Materials and Methods

**Materials:** All reagents were commercially available and used as supplied without further purification. Solvents were either employed as purchased or dried according to procedures described in the literature.  $^1\text{H}$  NMR spectra were recorded with a Bruker Avance DMX 600 spectrophotometer. Scanning Electron Microscopy (SEM) investigations were carried out on a JEOL 6390LV instrument. UV-vis spectra were taken on a HICITHI UH5300 spectrophotometer. Thermogravimetric analysis (TGA) was taken on a METTLER TG/DSC1/1600 instrument. Rheological testing was performed on MCR102 Advanced Rheology Expanded Systems. X-ray diffraction (XRD) measurements were carried out on a Bruker D2 PHASER instrument. The surface area was determined by Braunuer-Emmet-Teller (BET) method using a Micromeritics TriStar II Plus 3030 instrument. Liquid nitrogen was used to measure the isotherms of  $\text{N}_2$  adsorption and desorption at 77K.

**Synthesis of hydrogel:** All supramolecular polymer materials were synthesized according to the previously reported literatures.<sup>S1,S2</sup> By simply mixing **WP5** with different molar ratios of **PSS** at room temperature, pillar[5]arene-based bulk supramolecular hydrogel were obtained. For example, **WP5** (226 mg, 0.1 mmol) and **PSS** (206 mg, 1 mmol) were added into a 2 mL reagent bottle, and then 0.2 mL of water was added. Stir to mix thoroughly, it was left overnight at room temperature to complete the gelation process to obtain **SPH-1**.

## 2. Chemical structures of WP5, M and PSS

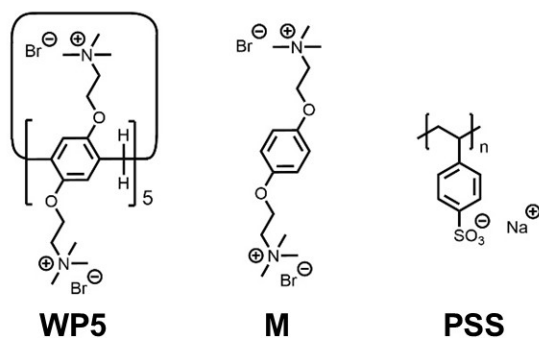

**Fig. S1** Chemical structures of **WP5**, **M** and **PSS**.

### 3. Macroscopic pictures of WP5- and M-based supramolecular polymers

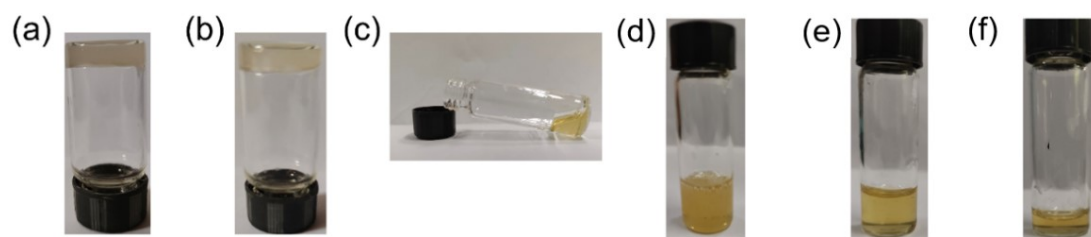

**Fig. S2** Macroscopic Pictures: (a) **SPH-1**, (b) **SPH-2**, (c) **SPH-3**, (d) **M1**, (e) **M2** and (f) **M3**.

#### 4. $^1\text{H}$ NMR characterization of the WP5-based supramolecular polymer

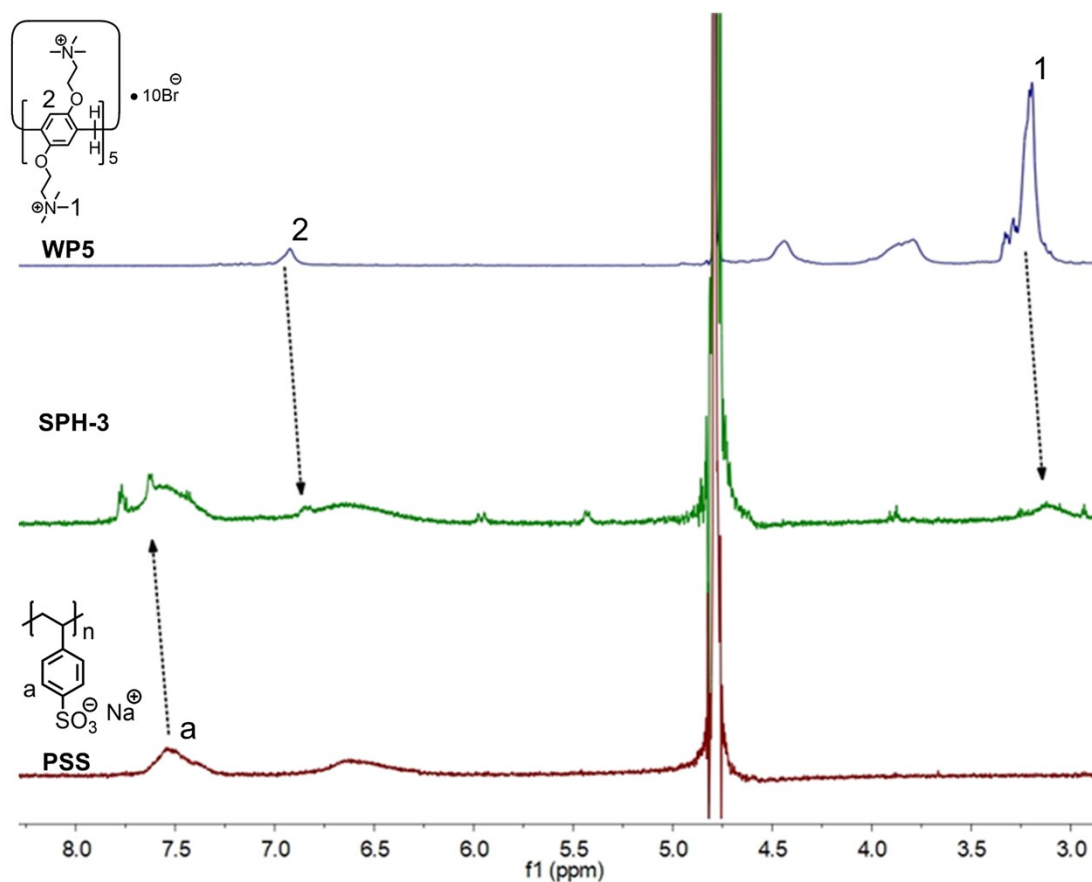

**Fig. S3** Partial  $^1\text{H}$  NMR spectra (600 MHz,  $\text{D}_2\text{O}$ , 298 K) of (a) **WP5** (5.00 mM), (b) **SPH-3** (the molar ratio of  $(-\text{N}(\text{CH}_3)_3^+)/\text{SO}_3^-$  is 1:10) (5.00 mM) and (c) **PSS** (5.00 mM).

#### 5. Water content analysis of hydrogel SPH-1

**Table S1.** Water content analysis.

| $W_d$          | $W_w$    | Water content |
|----------------|----------|---------------|
| 24.53 mg       | 14.75 mg | 66.3%         |
| 26.77 mg       | 15.16 mg | 76.6%         |
| 38.85 mg       | 22.16 mg | 75.3%         |
| Average: 72.7% |          |               |

where  $W_s$  (mg) and  $W_d$  (mg) are represent the masses of the swollen hydrogel and the dried hydrogel, respectively. The water content was determined from the average (72.7%) of three measurements.

## 6. TG Analysis

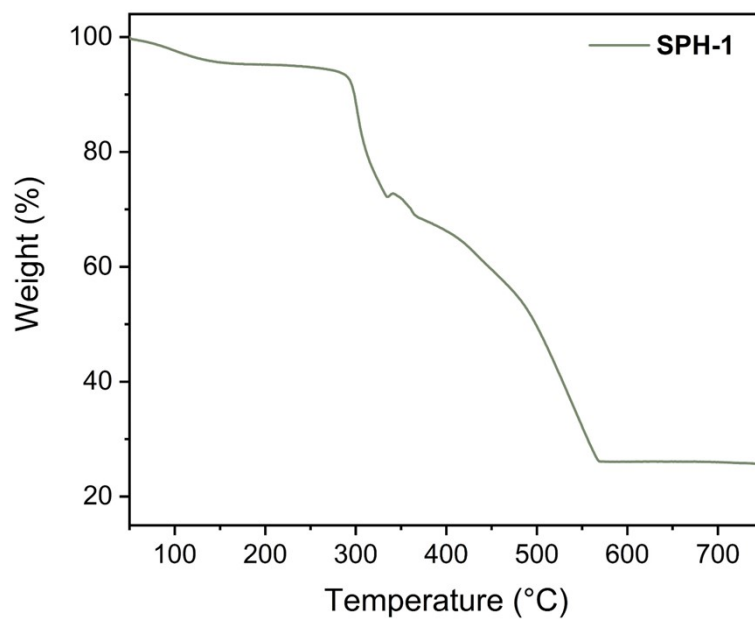

**Fig. S4** Thermogravimetric analysis results of SPH-1.

## 7. Porosity and surface area measurements for SPH-1

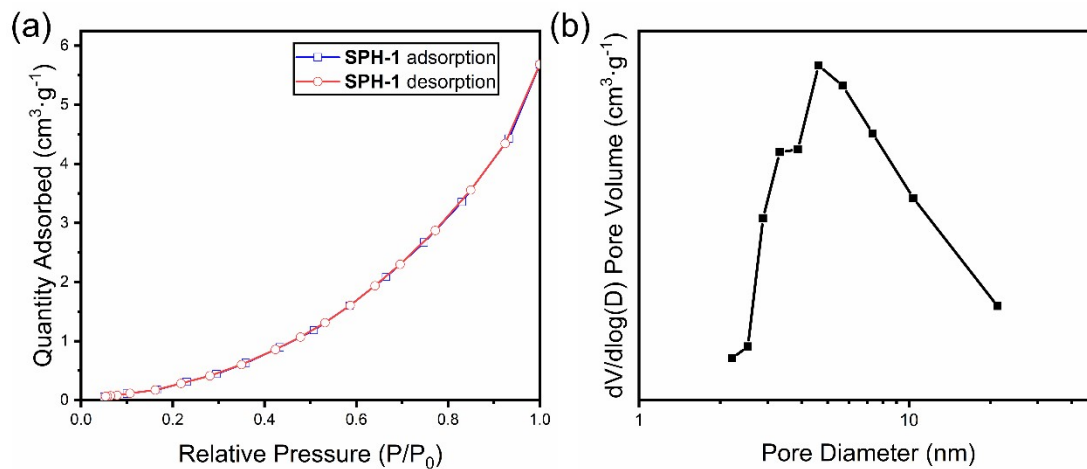

**Fig. S5 (a)** N<sub>2</sub> adsorption and desorption isotherm and (b) the pore size distribution of SPH-1.

## 8. XRD patterns

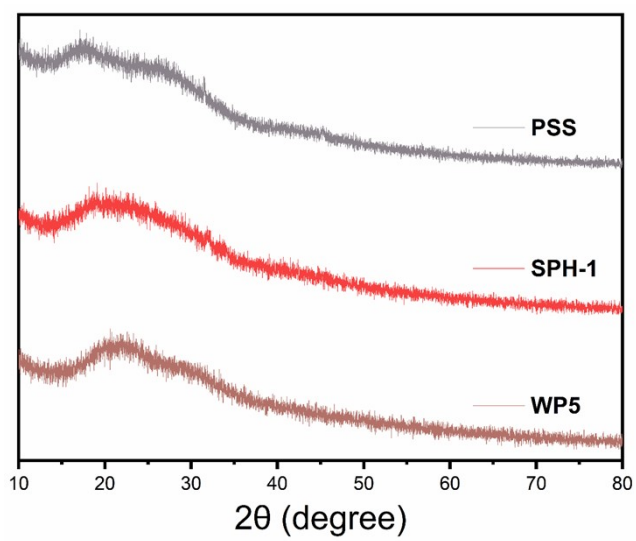

**Fig. S6** XRD patterns of **PSS** and **SPH-1** and **WP5**.

## 9. Adsorption data of SPH-1 and SPH-2

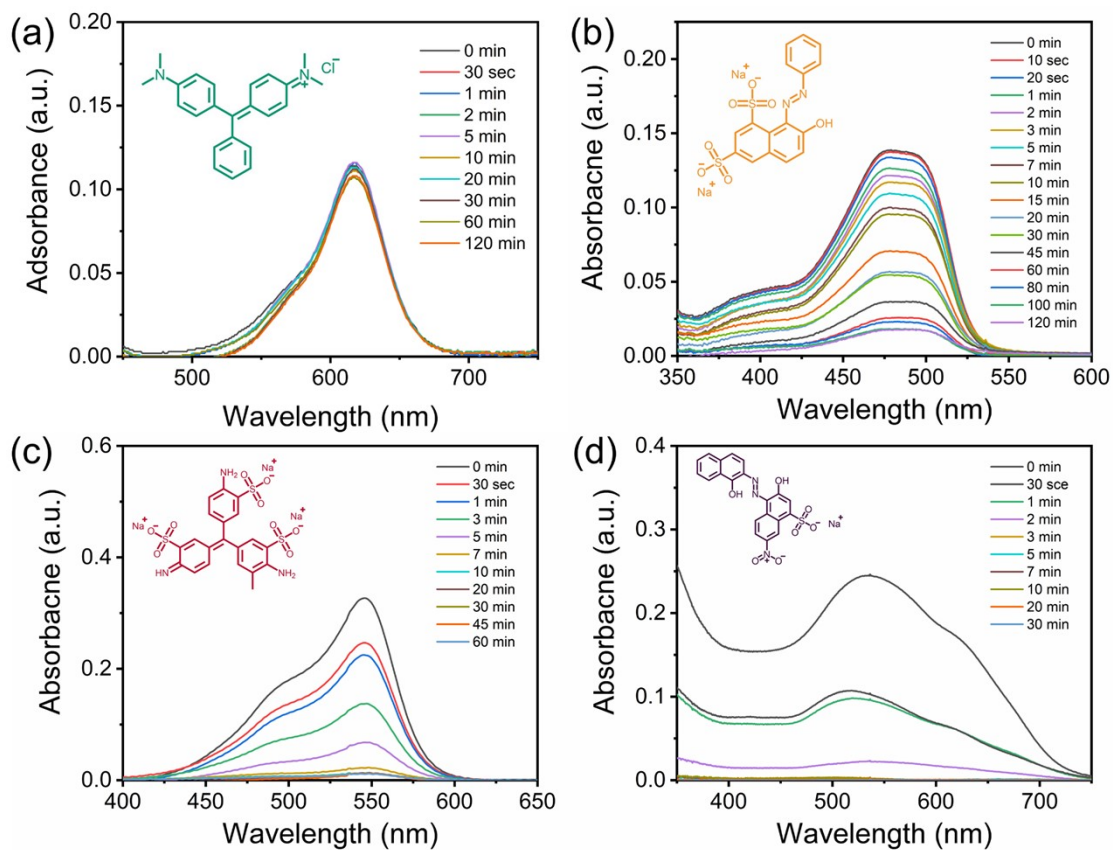

**Fig. S7** Time-dependent changes in UV-vis spectra of (a) MG, (b) MO, (c) AF by SPH-1 at 10-fold dilution. Time-dependent changes in UV-vis spectra of (d) EBT by SPH-1.



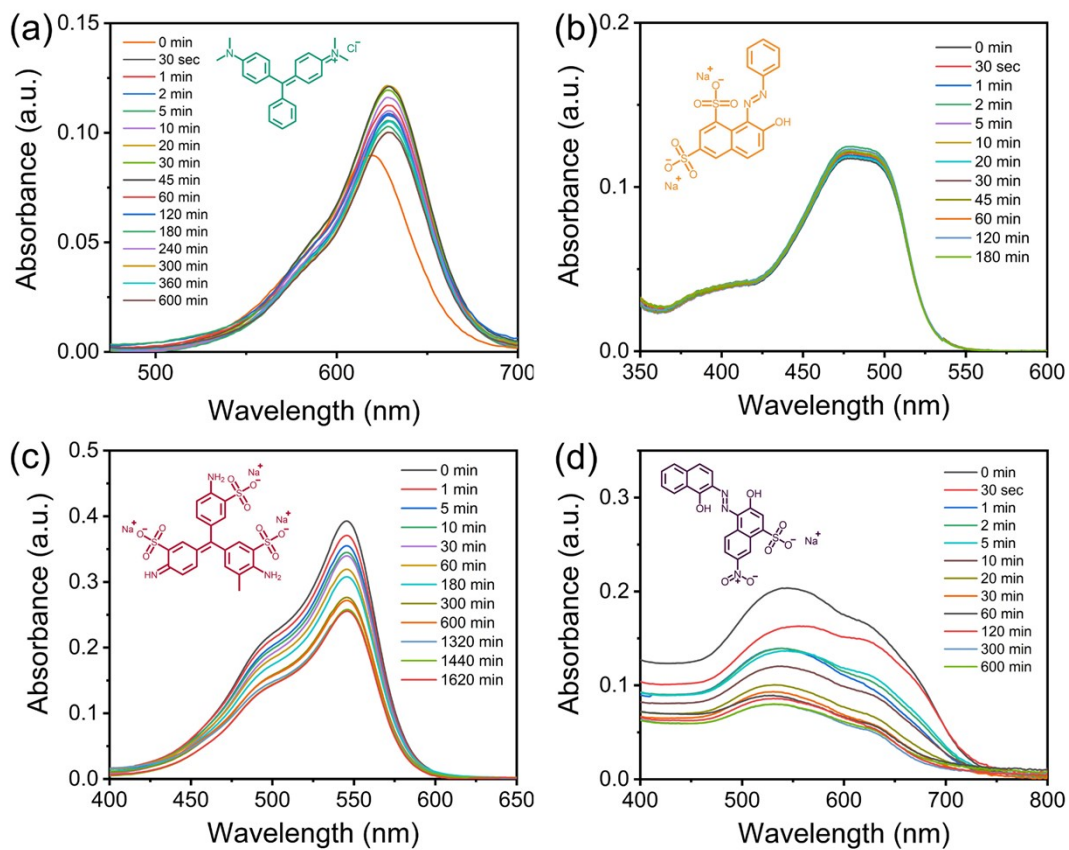

**Fig. S8** Time-dependent changes in UV-vis spectra of (a) MG, (b) MO, (c) AF by SPH-2 at 10-fold dilution. Time-dependent changes in UV-vis spectra of (d) EBT by SPH-2.

## 10. Adsorption kinetics

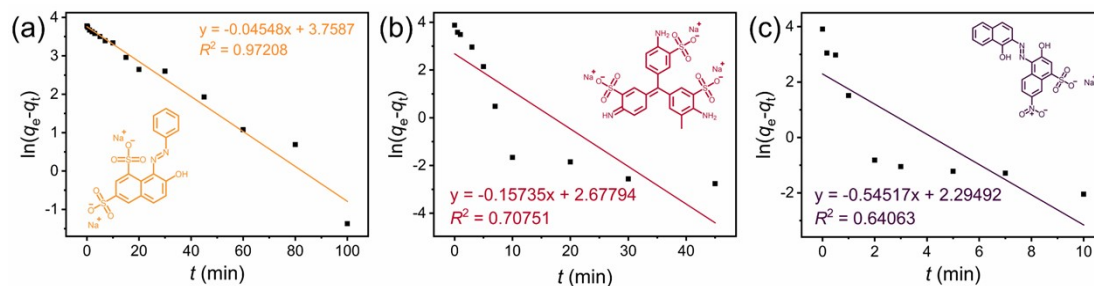

**Fig. S9** The pseudo-first-order plots of SPH-1 with (a) OG, (b) AF and (c) EBT.

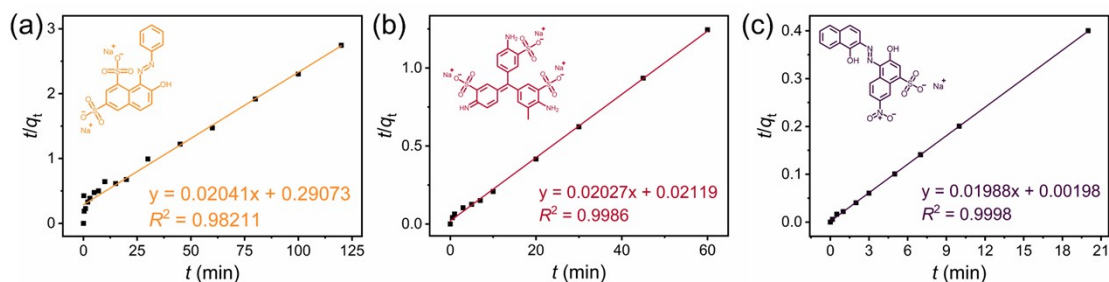

**Fig. S10** The pseudo-second-order plots of SPH-1 with (a) OG, (b) AF and (c) EBT.

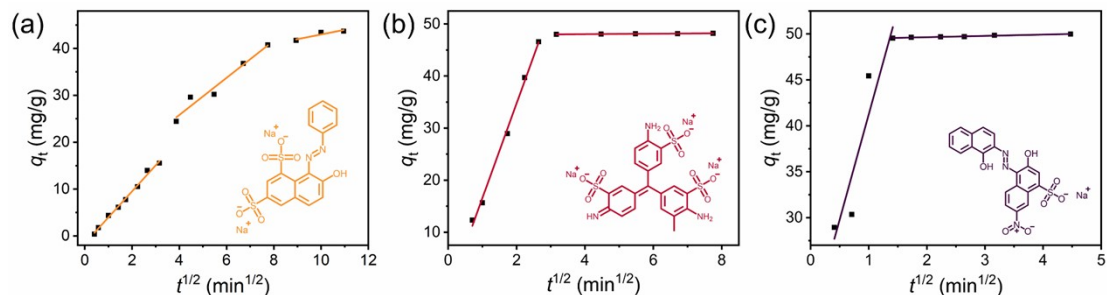

**Fig. S11** The Weber and Morris plots of SPH-1 with (a) OG, (b) AF and (c) EBT.

## 11. Adsorption isotherms

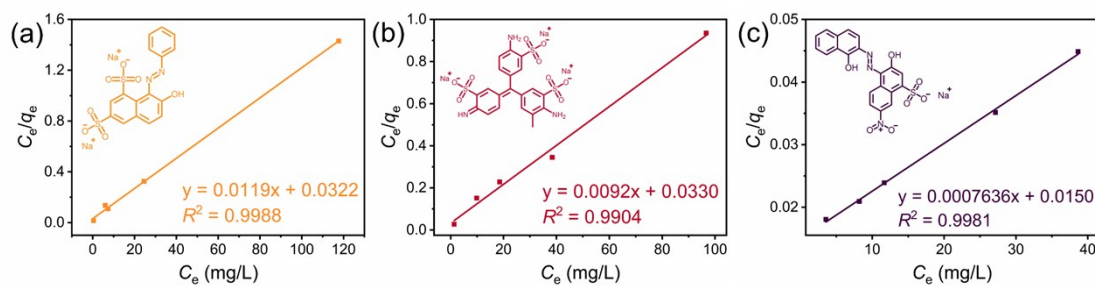

**Fig. S12** The Langmuir model plots of SPH-1 with (a) OG, (b) AF and (c) EBT.

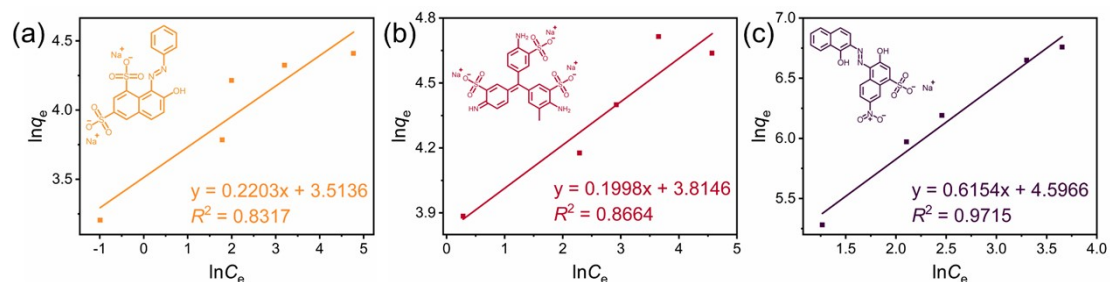

**Fig. S13** The Freundlich model plots of SPH-1 with (a) OG, (b) AF and (c) EBT.

## 12. Effect of ionic strength on adsorption of EBT

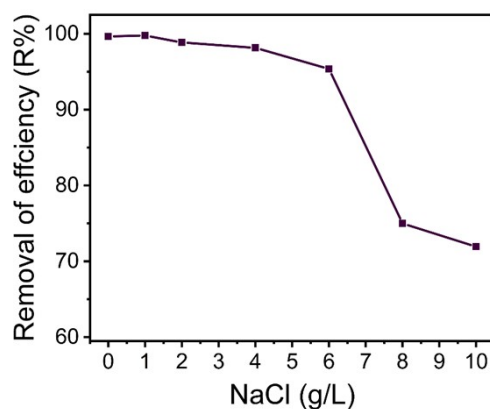

**Fig. S14** Effect of electrolyte (NaCl) strength on the removal of EBT by SPH-1.

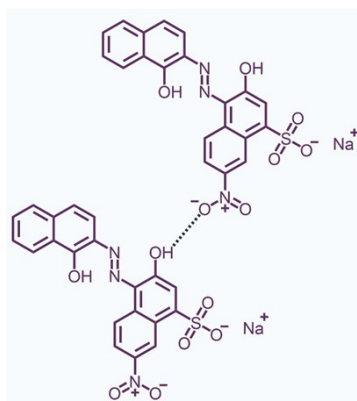

**Fig. S15** Representation of EBT molecules dimerization in the presence of NaCl.

### 13. Effect of pH on adsorption of EBT

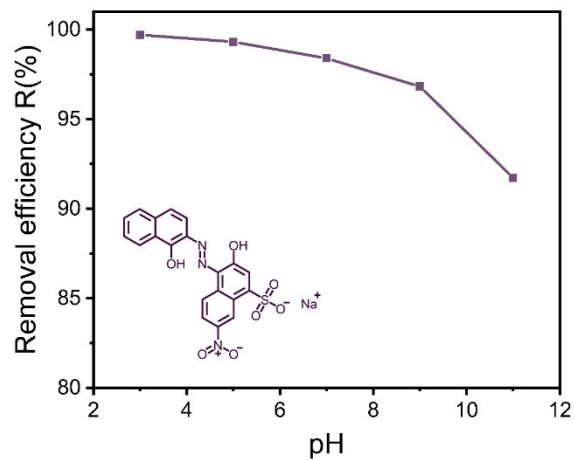

**Fig. S16** Effect of pH on the removal of EBT by **SPH-1** ( $T = 25.0\text{ }^{\circ}\text{C}$ ,  $C_0 = 50\text{ mg/L}$ , and pH range of 2–10).

### 14. $\text{pH}_{\text{PZC}}$ of SPH-1.

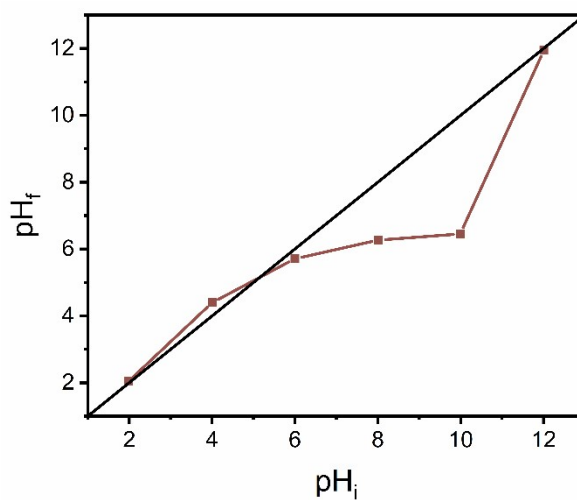

**Fig. S17**  $\text{pH}_{\text{PZC}}$  of **SPH-1**.

### 15. Adsorption data of SPH-1 with EBT at PH = 3

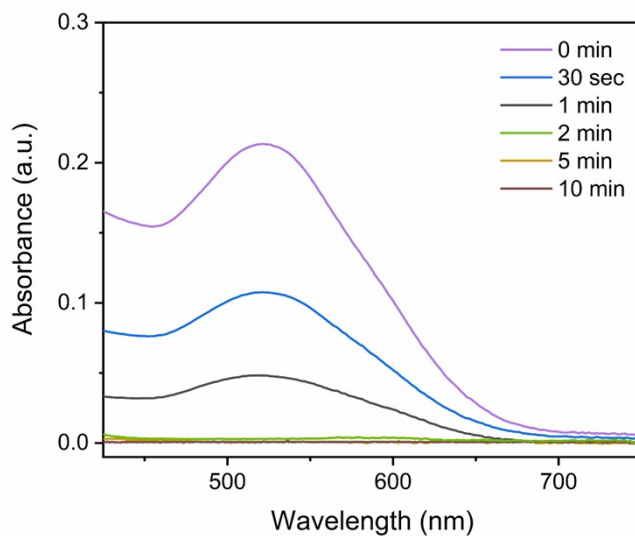

**Fig. S18** Time-dependent changes in UV-vis spectra of EBT by SPH-1 at pH = 3.

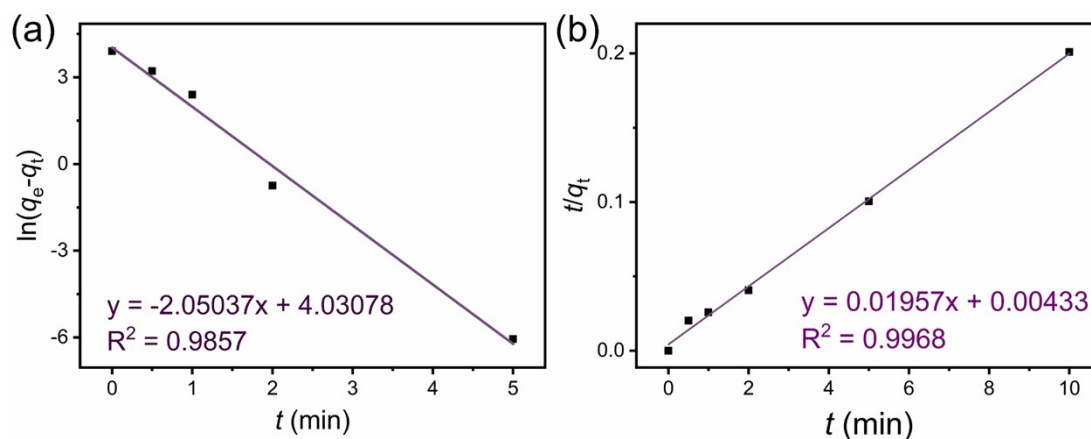

**Fig. S19** The pseudo-first-order plots of SPH-1 with EBT at pH = 3. (b) The pseudo-second-order plots of SPH-1 with EBT pH = 3.

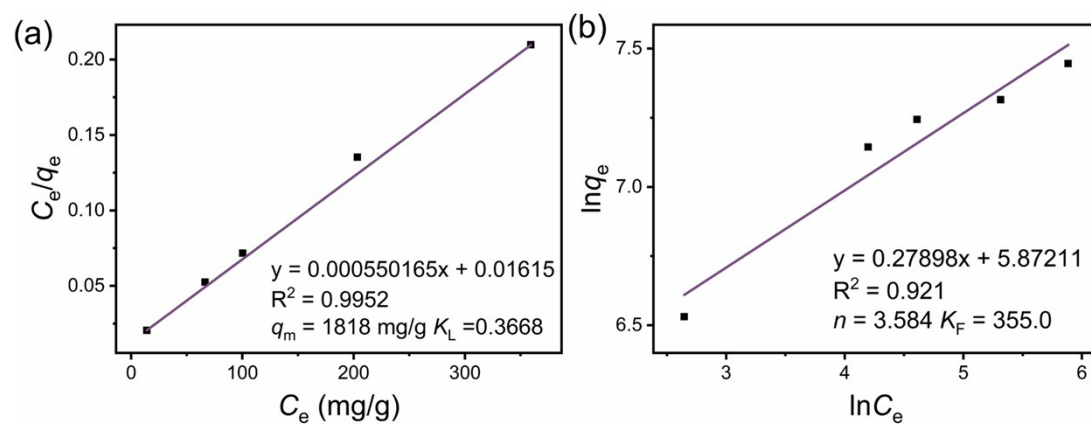

**Fig. S20** The Langmuir model plots (a) and the Freundlich model plots (b) of SPH-1 with EBT at pH = 3.

## 16. Adsorption studies of EBT dye in real samples

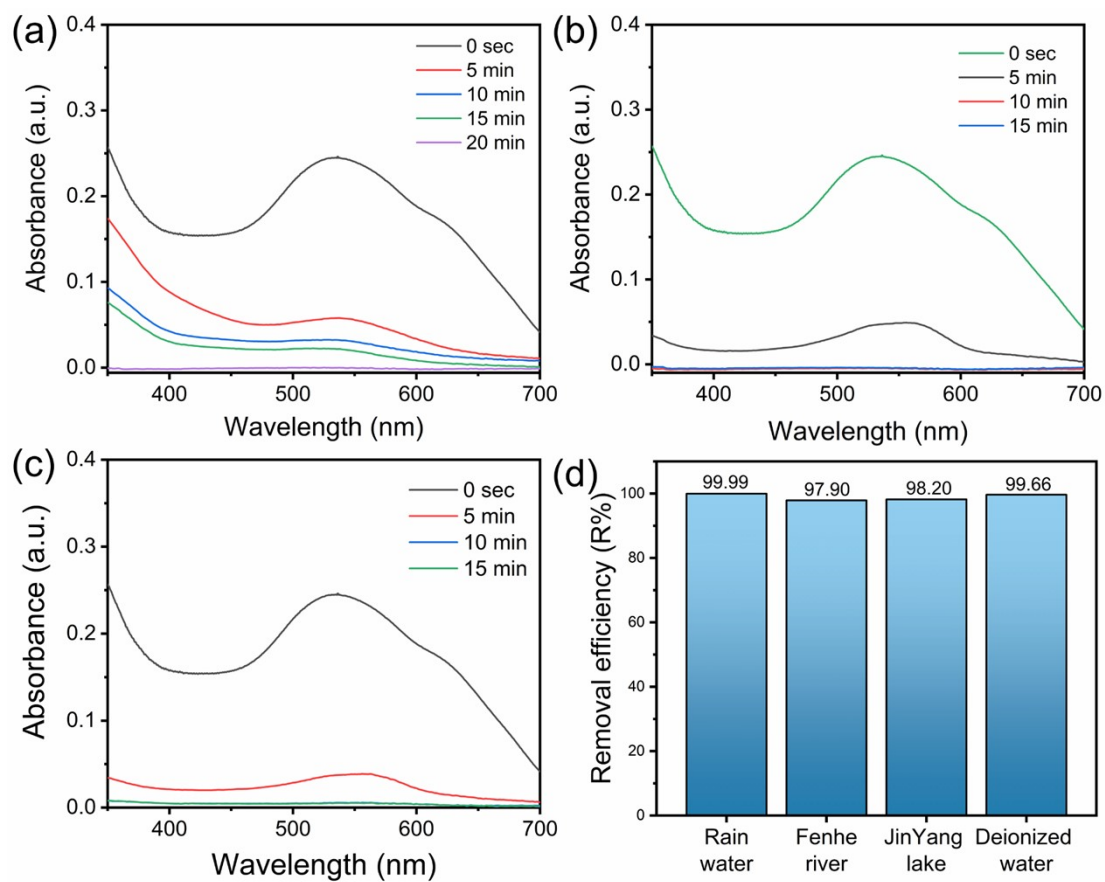

Fig. S21 Percentage removal of EBT dye in various real water samples.

## 17. Selective adsorption

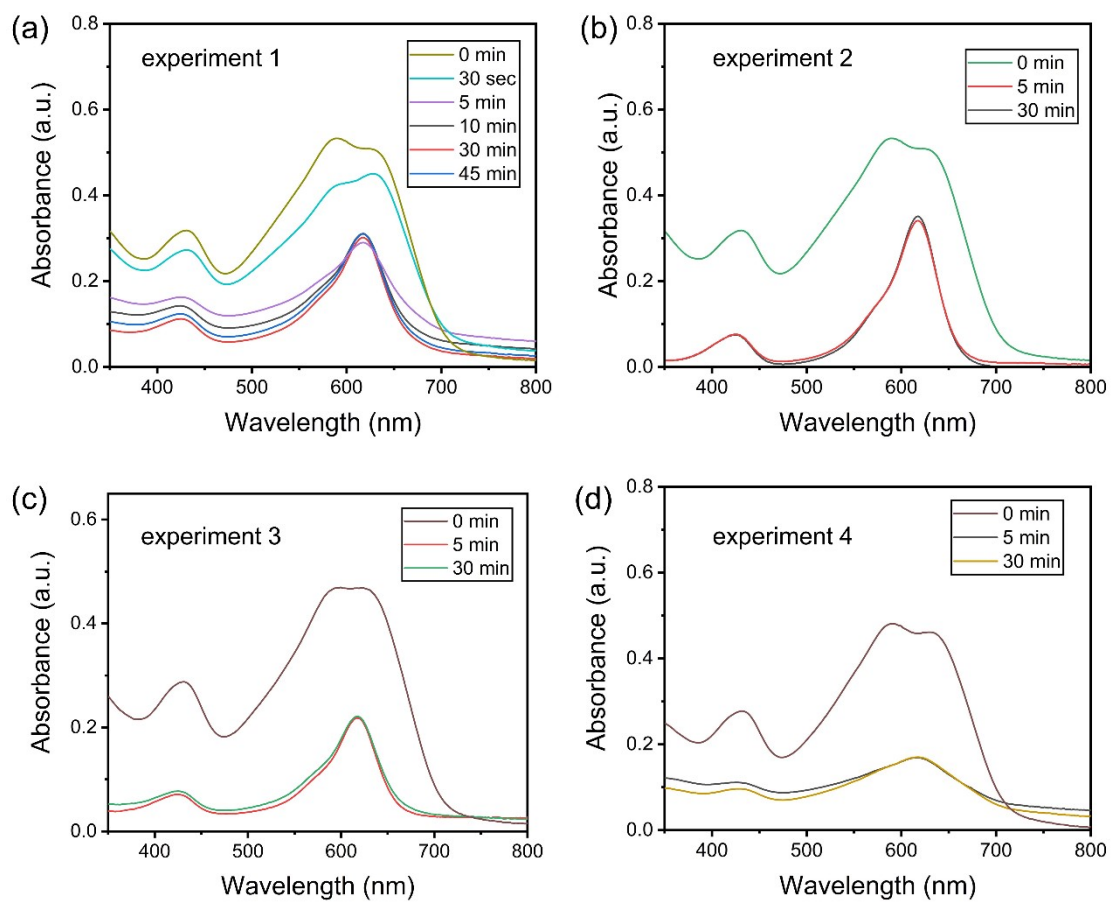

**Fig. S22** The UV-vis spectra of the mixed solution of EBT and MG before and after adsorption by **SPH-1** by four times. The initial concentration of EBT and MG was 100 mg/L.

## 18. Activated carbon adsorption data with EBT

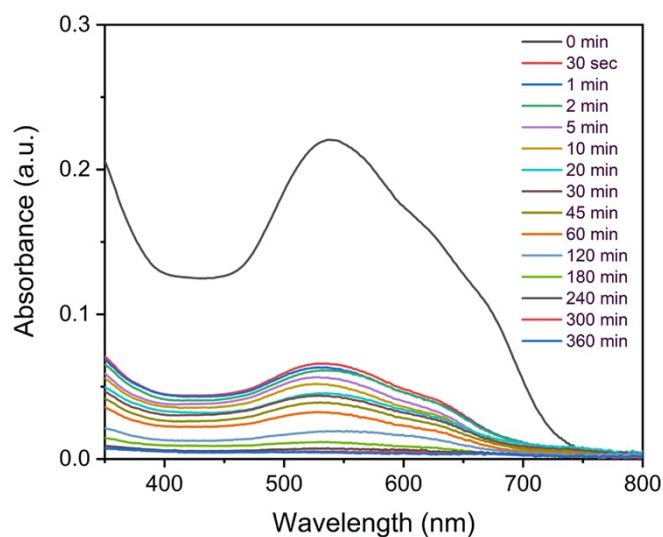

**Fig. S23** Time-dependent changes in UV-vis spectra of EBT by activated carbon.

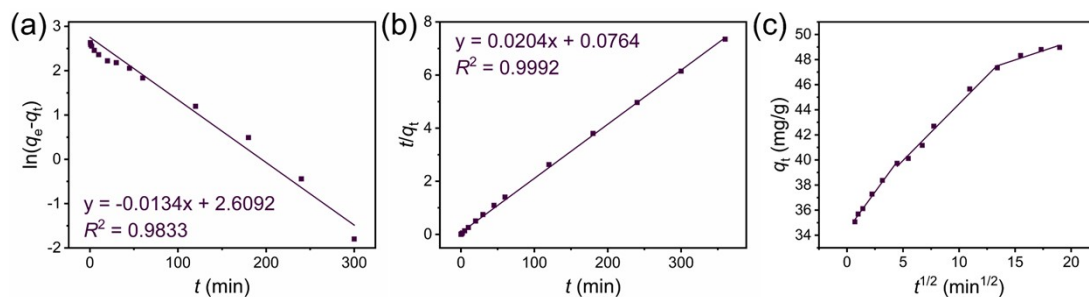

**Fig. S24** (a) The pseudo-first-order plots of activated carbon with EBT. (b) The pseudo-second-order plots of activated carbon with EBT. (c) The Weber and Morris plots of activated carbon with EBT.

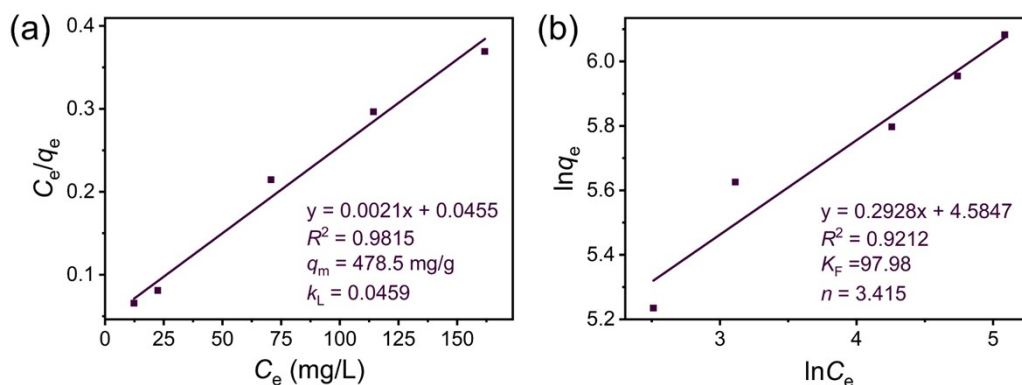

**Fig. S25** The Langmuir model plots (a) and the Freundlich model plots (b) of activated carbon with EBT.



## References

- (1) Hua, B.; Shao, L.; Yu, G.; Huang, F. Fluorescence indicator displacement detection based on pillar[5]arene-assisted dye deprotonation. *Chemical Communications* **2016**, 52 (65), 10016-10019.
- (2) Gui, J.-C.; Yan, Z.-Q.; Peng, Y.; Yi, J.-G.; Zhou, D.-Y.; Su, D.; Zhong, Z.-H.; Gao, G.-W.; Wu, W.-H.; Yang, C. Enhanced head-to-head photodimers in the photocyclodimerization of anthracenecarboxylic acid with a cationic pillar[6]arene. *Chinese Chemical Letters* **2016**, 27 (7), 1017-1021.
